# Supplementary material for: On the classification of simple and complex biological images using Krawtchouk moments and Generalized pseudo-Zernike moments: a case study with fly wing images and breast cancer mammograms
Source: PeerJ journal article supplement (doi:10.7717/peerj-cs.698), 2021-09-09
Supplement: Supplemental_File2.pdf [file Supplemental_File2.pdf]

**Supplemental File 2 to Classification of simple and complex biological images using Krawtchouk moments and Generalized Pseudo-Zernike moments: a case study with fly wing images and breast cancer mam-mograms**

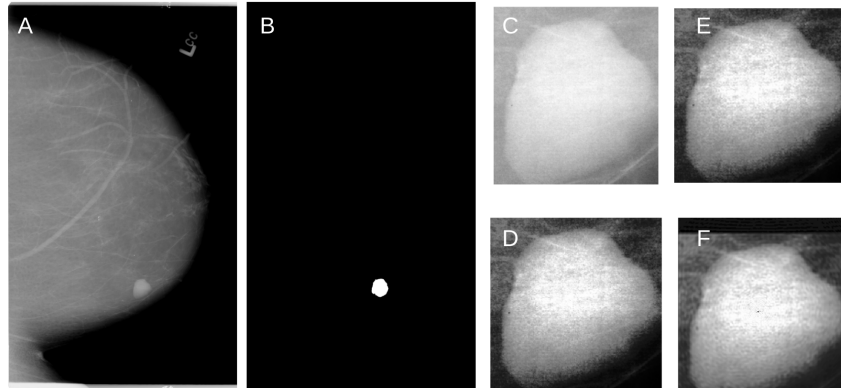

Figure 1: (A) An example of the raw mammogram image showing benign circumscribed breast tumor (index no. P\_01712). (B) Binarized mammogram image showing the tumor (white). (C) Region of interest centered on the tumor ( $296 \text{ pixel} \times 319 \text{ pixel}$ ) before (D) Enhancement. (E) Reconstruction using KM; (F) Reconstruction using GPZM.

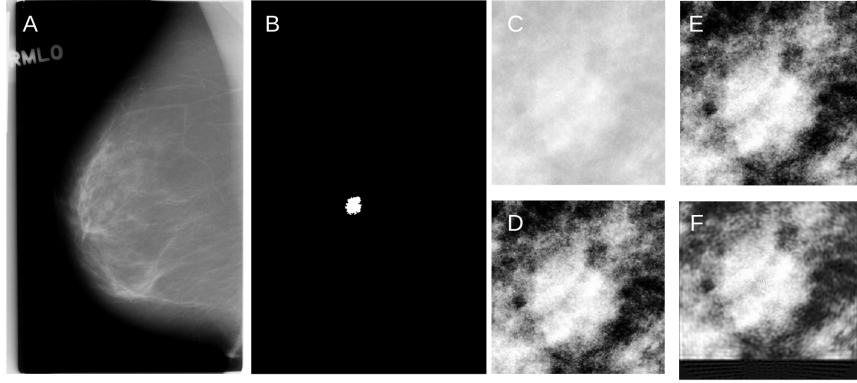

Figure 2: (A) An example of the raw mammogram image showing benign circumscribed breast tumor (index no. P\_01395). (B) Binarized mammogram image showing the tumor (white). (C) Region of interest centered on the tumor (259 pixel  $\times$  275 pixel) before (D) Enhancement. (E) Reconstruction using KM; (F) Reconstruction using GPZM.

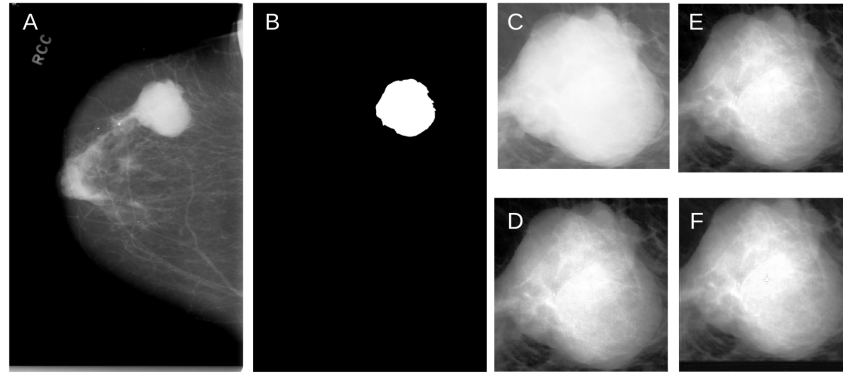

Figure 3: (A) An example of the raw mammogram image showing malignant circumscribed breast tumor (index no. P\_01270). (B) Binarized mammogram image showing the tumor (white). (C) Region of interest centered on the tumor (996 pixel  $\times$  960 pixel) before (D) Enhancement. (E) Reconstruction using KM; (F) Reconstructed using GPZM.
